# Supplementary material for: Near zero singlet–triplet gap through nonfullerene core modification with phenalene derivative building blocks
Source: Royal Society of Chemistry journal article supplement (doi:10.1039/d5cp00767d), 2025-01-01
Supplement: d5cp00767d1.pdf [file d5cp00767d1.pdf]

## Supporting Information

### Near Zero Singlet–Triplet Gap Through Nonfullerene Core Modification with Phenalene Derivatives Building Blocks

*Leandro Benatto,<sup>a,\*</sup> Marlus Koehler,<sup>a</sup> Rodrigo B. Capaz,<sup>b,c</sup> Graziâni Candiotto<sup>a</sup>*

<sup>a</sup> *Institute of Physics, Federal University of Rio de Janeiro, 21941-909, Rio de Janeiro-RJ, Brazil*

<sup>b</sup> *Department of Physics, Federal University of Paraná, 81531-980, Curitiba-PR, Brazil*

<sup>b,c</sup> *Brazilian Nanotechnology National Laboratory (LNNano), Brazilian Center for Research in Energy and Materials (CNPEM), Campinas, São Paulo, 13083-100, Brazil*

\*Corresponding author: lb08@fisica.ufpr.br

|                                                |              |
|------------------------------------------------|--------------|
| <b>S1. Complementary Computational Methods</b> | Page S2      |
| <b>S2. Complementary Results</b>               | Pages S3-S10 |
| <b>S3. References</b>                          | Page S11     |

## S1. Complementary Computational Methods

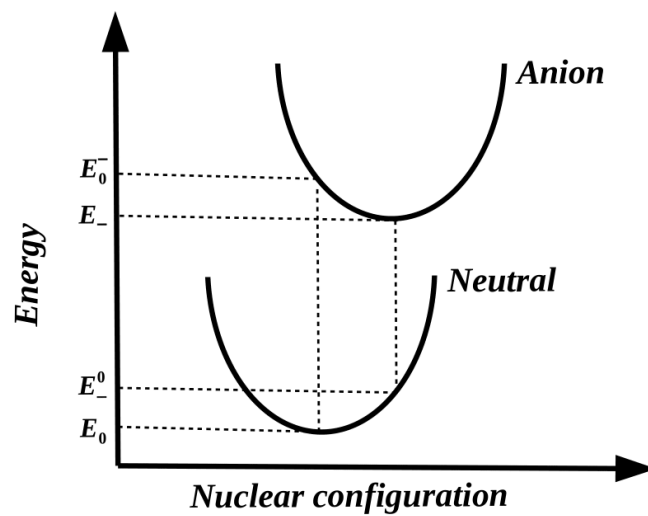

**Figure S1:** Schematic representation of the molecular potential energy surface as a function of the nuclear configuration in the neutral and charged state.

## S2. Complementary Results

**Table S1:** Singlet and triplet vertical excitation energies [eV] calculated with different excited-state electronic structure methods, resulting singlet–triplet gaps, and the reference. Results for different phenalene derivatives and benzothiadiazole small molecules.

| Molecule                                                                | Method                     | $E_{S1}$ | $E_{T1}$ | $\Delta E_{ST}$ | Reference           |
|-------------------------------------------------------------------------|----------------------------|----------|----------|-----------------|---------------------|
| Phenalene derivative that constitutes the A1 molecule (cyc[3.3.3]azine) | $\omega$ B2PLYP'/def2-SVP  | 1.32     | 1.27     | 0.04            | [1], This work      |
|                                                                         | $\omega$ B2PLYP'/def2-TZVP | 1.29     | 1.24     | 0.05            | This work           |
|                                                                         | ADC(2)/cc-pVDZ             | 1.04     | 1.20     | −0.16           | [1], [2]            |
|                                                                         | EOM-CCSD/cc-pVDZ           | 1.09     | 1.19     | −0.10           | [1], [2], This work |
|                                                                         | EOM-CCSD/def2-SVP          | 1.04     | 1.17     | −0.13           | This work           |
|                                                                         | CIS(D)/cc-pVDZ             | 1.07     | 1.37     | −0.30           | [2], This work      |
|                                                                         | CIS(D)/def2-SVP            | 1.03     | 1.37     | −0.34           | This work           |
| 5AP (1,3,4,6,9b-pentaazaphenalene)                                      | $\omega$ B2PLYP'/def2-SVP  | 2.481    | 2.436    | 0.045           | This work           |
|                                                                         | $\omega$ B2PLYP'/def2-TZVP | 2.558    | 2.473    | 0.085           | This work           |
|                                                                         | ADC(2)/def2-TZVP           | 2.154    | 2.296    | −0.142          | [3]                 |
|                                                                         | EOM-CCSD/cc-pVDZ           | 2.251    | 2.329    | −0.078          | [1], This work      |
|                                                                         | EOM-CCSD/def2-SVP          | 2.194    | 2.306    | −0.112          | This work           |
|                                                                         | CIS(D)/def2-SVP            | 2.086    | 2.623    | −0.537          | This work           |
|                                                                         | <b>Experimental</b>        | 1.957    | 2.003    | −0.047          | [4]                 |
| Phenalene derivative that constitutes the A1-5F molecule                | $\omega$ B2PLYP'/def2-SVP  | 0.89     | 0.86     | 0.03            | This work           |
|                                                                         | $\omega$ B2PLYP'/def2-TZVP | 0.91     | 0.86     | 0.05            | This work           |
|                                                                         | EOM-CCSD/def2-SVP          | 0.64     | 0.77     | −0.13           | This work           |
|                                                                         | CIS(D)/def2-SVP            | 0.61     | 0.95     | −0.34           | This work           |
| Phenalene derivative that constitutes the B1 molecule                   | $\omega$ B2PLYP'/def2-SVP  | 2.33     | 2.23     | 0.1             | This work           |
|                                                                         | $\omega$ B2PLYP'/def2-TZVP | 2.27     | 2.17     | 0.1             | This work           |
|                                                                         | EOM-CCSD/def2-SVP          | 2.13     | 2.17     | −0.04           | This work           |
|                                                                         | CIS(D)/def2-SVP            | 2.09     | 2.37     | −0.28           | This work           |
| Benzothiadiazole that constitutes the Y6 molecule                       | $\omega$ B2PLYP'/def2-SVP  | 4.71     | 2.36     | 2.35            | This work           |
|                                                                         | $\omega$ B2PLYP'/def2-TZVP | 4.51     | 2.38     | 2.13            | This work           |
|                                                                         | EOM-CCSD/def2-SVP          | 4.64     | 2.67     | 1.97            | This work           |
|                                                                         | CIS(D)/def2-SVP            | 4.90     | 3.16     | 1.74            | This work           |

**Table S2:** Excited-state energies calculated both in vacuum and with implicit solvent corrections using the conductor-like polarizable continuum model (C-PCM).

| Method                                            | Y6       |          |                 | A1       |          |                 | A1-5F    |          |                 |
|---------------------------------------------------|----------|----------|-----------------|----------|----------|-----------------|----------|----------|-----------------|
|                                                   | $E_{S1}$ | $E_{T1}$ | $\Delta E_{ST}$ | $E_{S1}$ | $E_{T1}$ | $\Delta E_{ST}$ | $E_{S1}$ | $E_{T1}$ | $\Delta E_{ST}$ |
| $\omega$ B2PLYP'/def2-SVP                         | 2.451    | 1.66     | 0.791           | 1.635    | 1.325    | 0.31            | 1.22     | 1.195    | 0.025           |
| $\omega$ B2PLYP'/def2-SVP/C-PCM <sup>a</sup>      | 2.413    | 1.689    | 0.727           | 1.534    | 1.23     | 0.295           | 1.236    | 1.189    | 0.047           |
| $\omega$ B2PLYP'/def2-SVP/C-PCM-Chlo <sup>b</sup> | 2.418    | 1.691    | 0.724           | 1.539    | 1.239    | 0.309           | 1.264    | 1.188    | 0.076           |

<sup>a</sup> Results assuming a dielectric constant of 4.0, and a refractive index of 1.8. <sup>b</sup> Results in chloroform medium.

**Table S3:** Singlet and triplet vertical excitation energies [eV] calculated with different excited-state electronic structure methods, and resulting singlet–triplet gaps.

| Molecules | $\omega$ B2PLYP'/def2-SVP |          |                 | CIS(D)/def2-SVP |          |                 |
|-----------|---------------------------|----------|-----------------|-----------------|----------|-----------------|
|           | $E_{S1}$                  | $E_{T1}$ | $\Delta E_{ST}$ | $E_{S1}$        | $E_{T1}$ | $\Delta E_{ST}$ |
| Y6        | 2.451                     | 1.66     | 0.791           | 2.327           | 2.139    | 0.188           |
| A1        | 1.635                     | 1.325    | 0.31            | 1.245           | 1.433    | −0.188          |
| A1-2F     | 1.462                     | 1.285    | 0.177           | 1.113           | 1.399    | −0.286          |
| A1-3F     | 1.461                     | 1.266    | 0.195           | 1.105           | 1.378    | −0.273          |
| A1-5F     | 1.22                      | 1.195    | 0.025           | 0.874           | 1.283    | −0.409          |
| B1        | 2.173                     | 1.641    | 0.532           | 1.822           | 1.908    | −0.086          |
| B1-5F     | 2.273                     | 1.694    | 0.579           | 2.003           | 2.031    | −0.028          |
| C1        | 1.935                     | 1.549    | 0.386           | 1.578           | 1.779    | −0.201          |
| C1-3F     | 1.729                     | 1.476    | 0.316           | 1.431           | 1.681    | −0.25           |

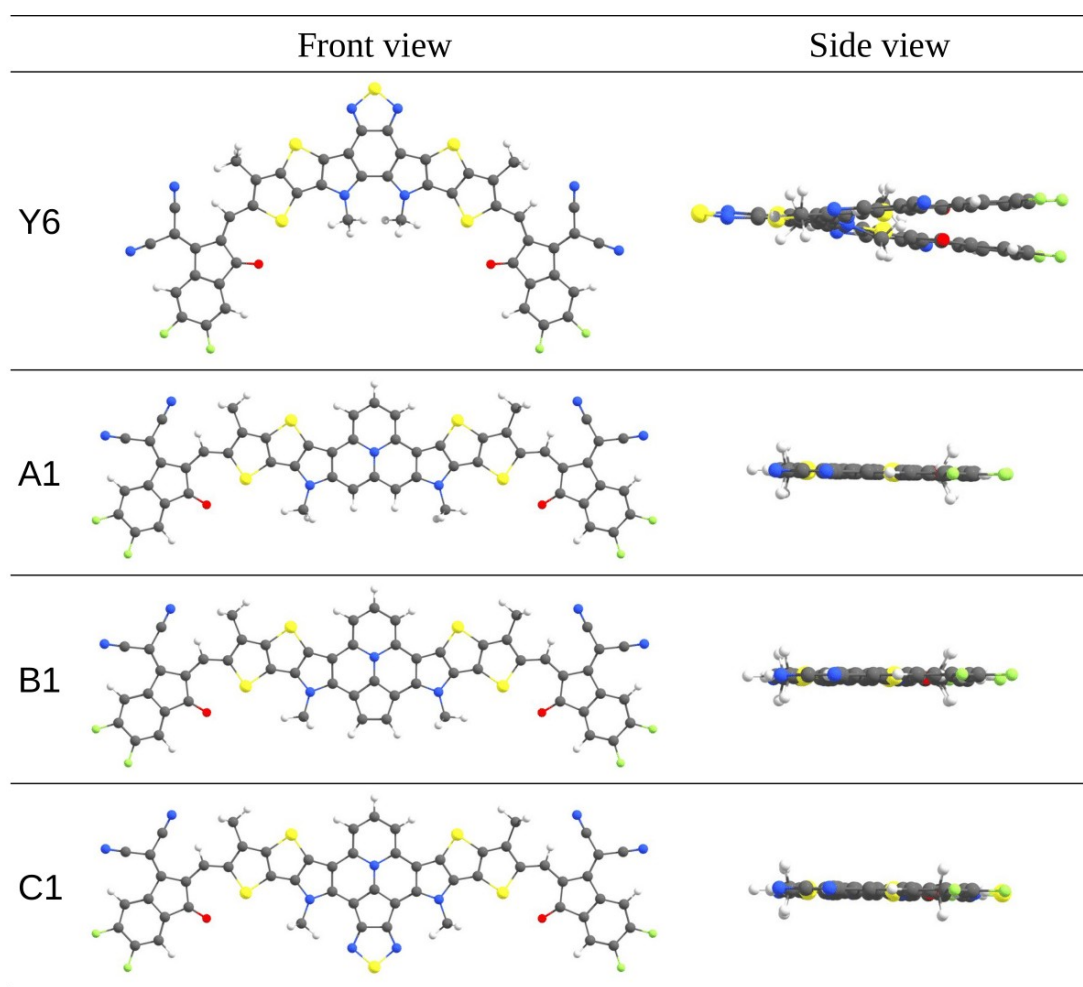

**Figure S2:** Optimized structure of molecules in front and side view.

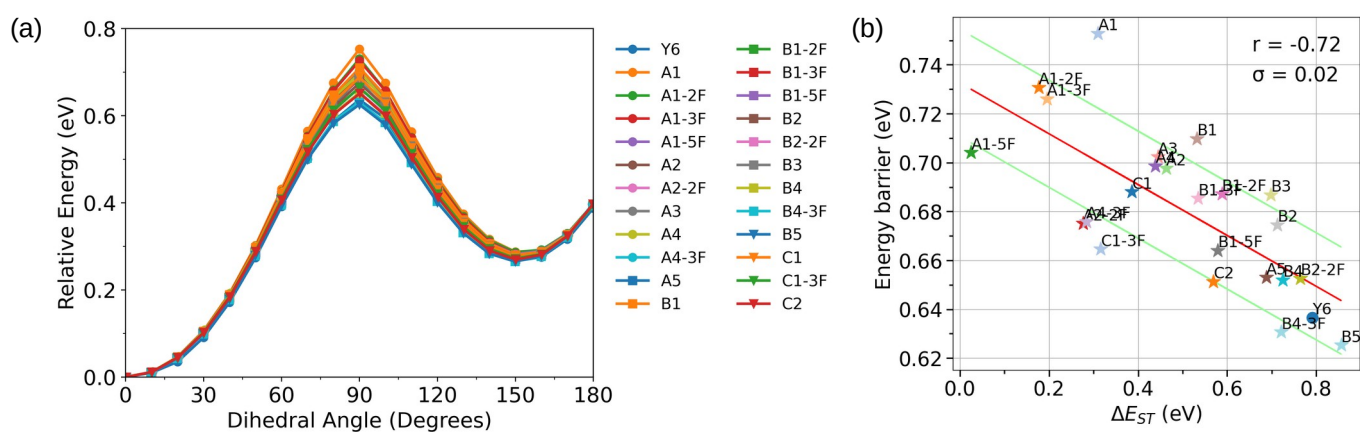

**Figure S3:** (a) Relative molecular energy vs the dihedral angle between central fused-ring core and acceptor end-group. (b) Correlation between  $\Delta E_{ST}$  and the rotation energy barrier. The linear regression line is in red, where  $r$  is the Pearson's correlation coefficient. The green lines are  $\pm$  one standard deviation ( $\sigma$ ) around the linear regression.

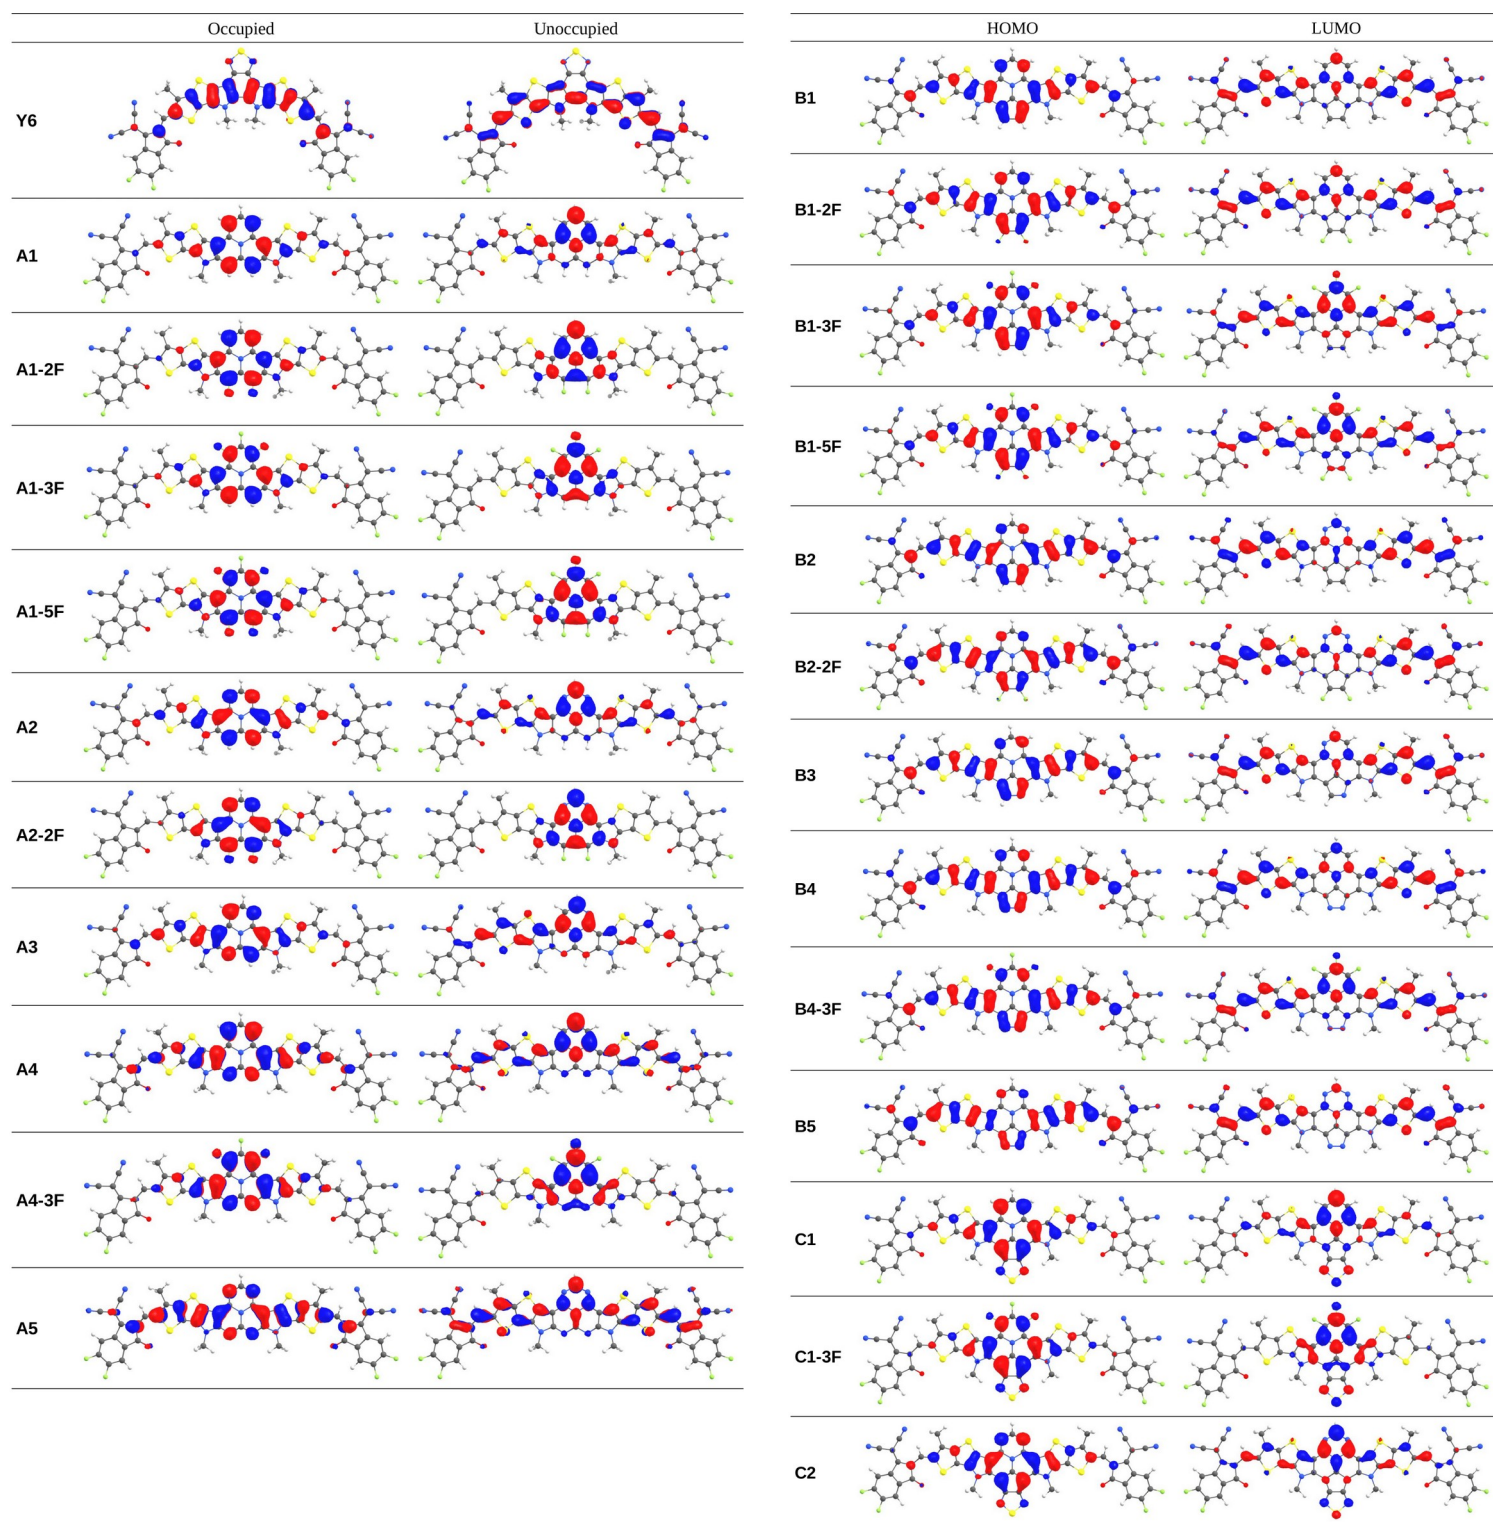

**Figure S4:** Natural transition orbitals of the first excited singlet state ( $S_1$ ) (isovalues 0.03).

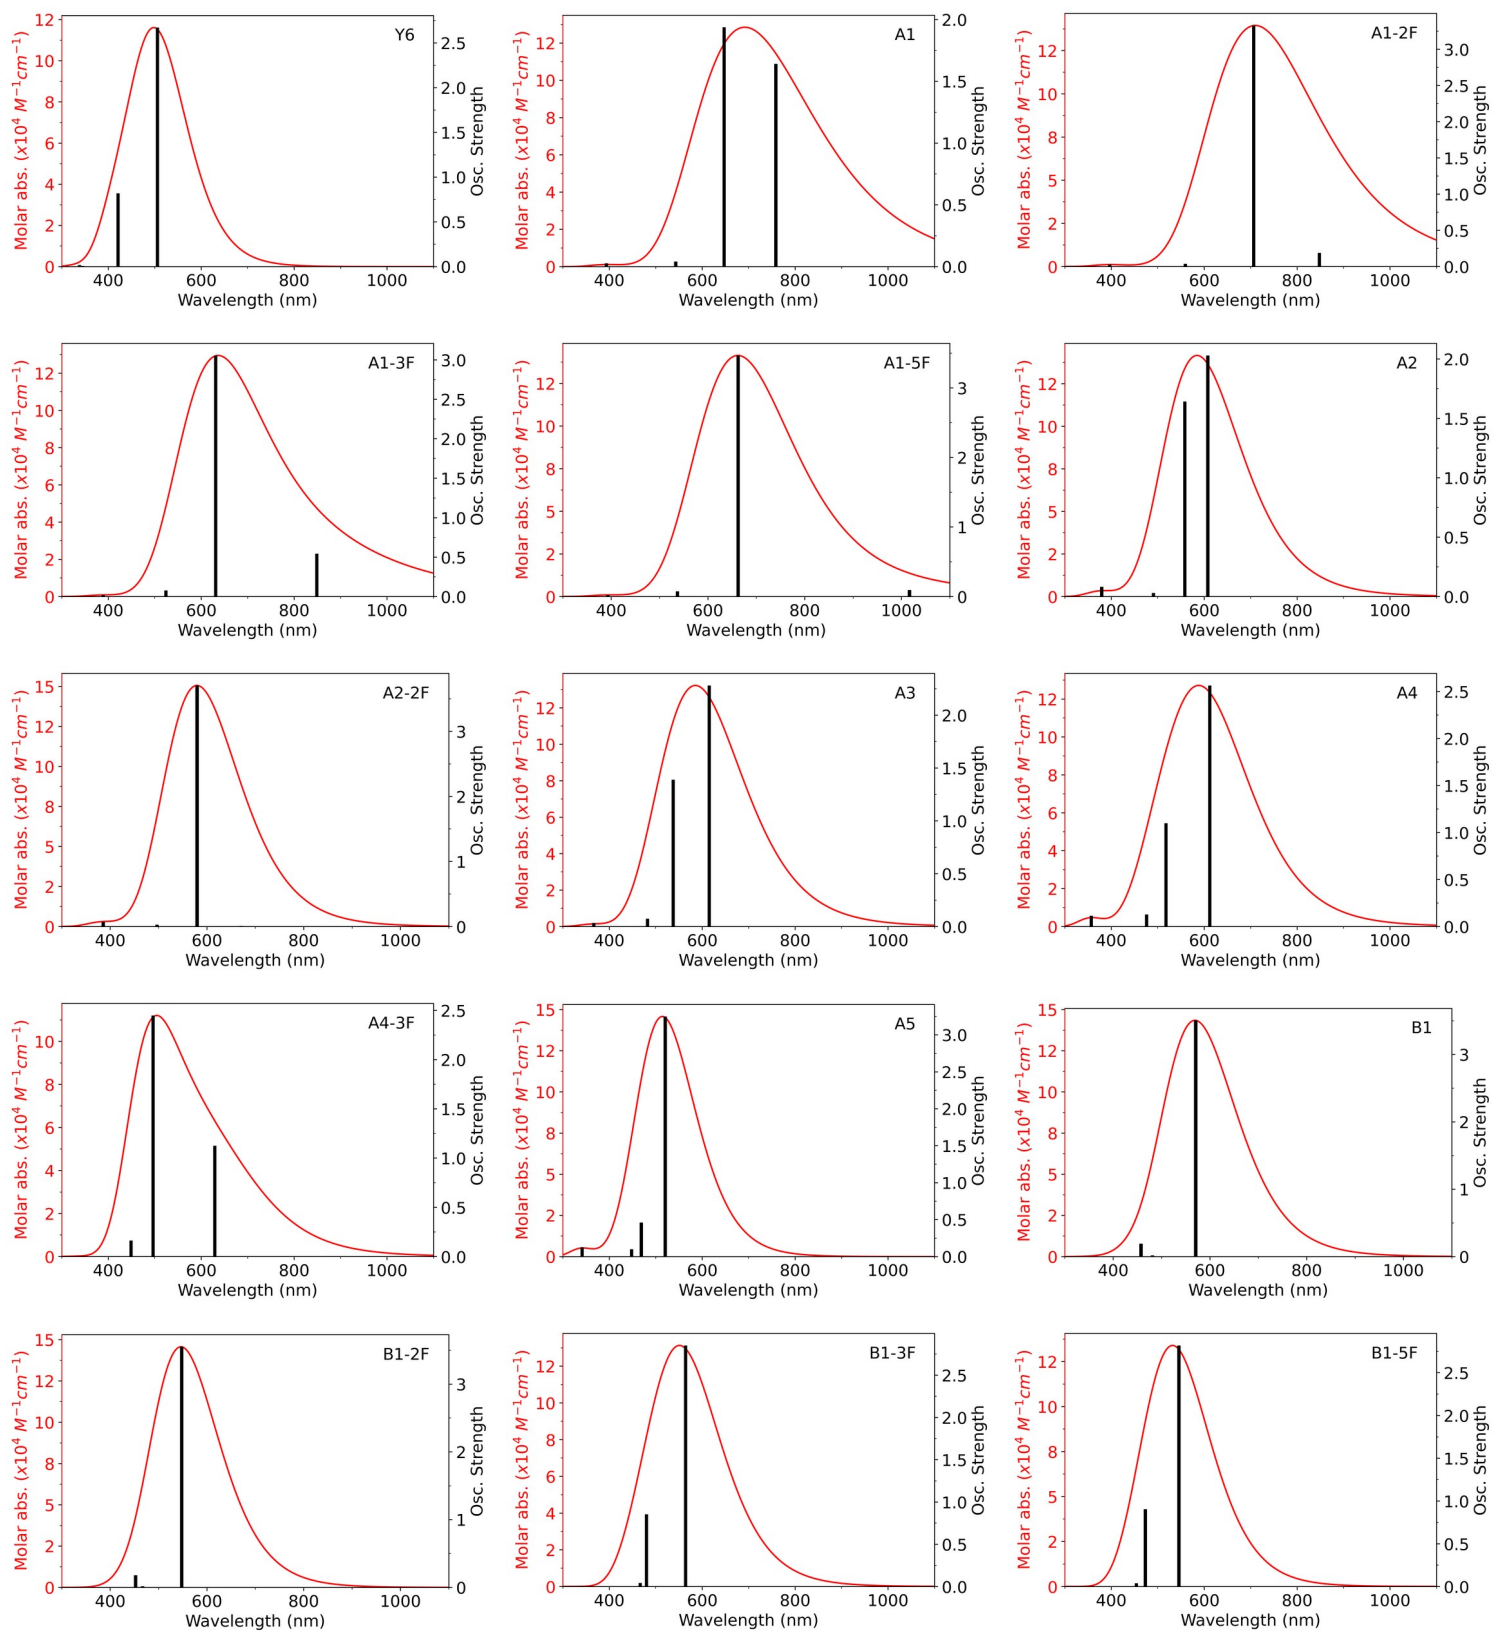



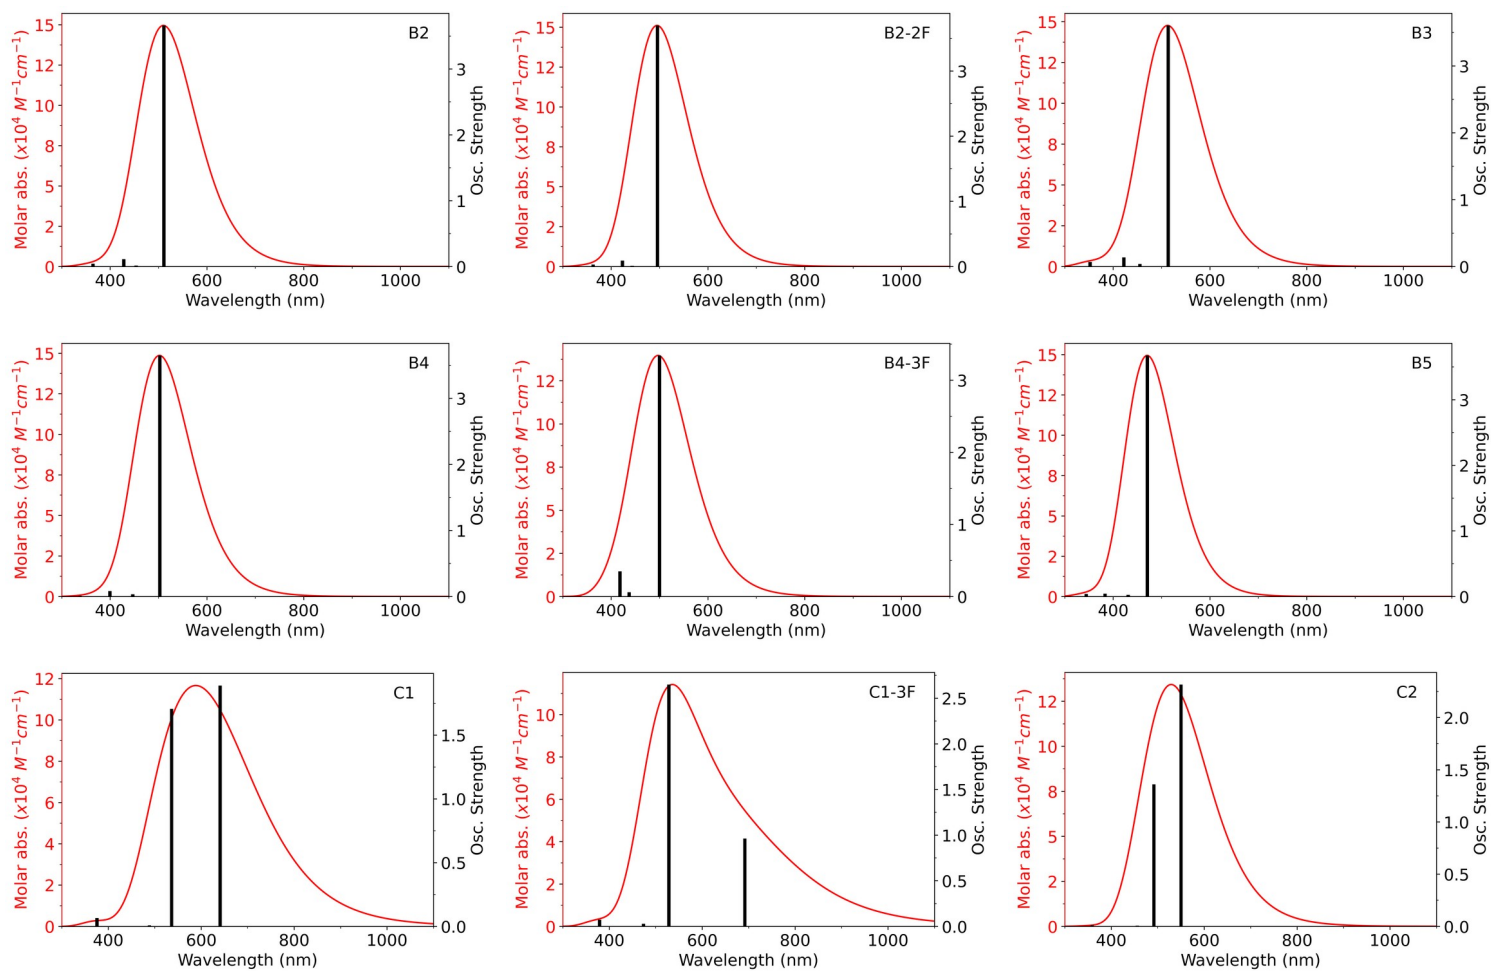

**Figure S5:** Absorption spectra and oscillator strength of the vertical electronic transitions.



**Table S4:** Summary of the correlation between  $\Delta E_{ST}$  and some molecular properties. The correlation strength classification was also presented.

| Molecular property                                                             | Correlation coefficient ( $r$ ) | Correlation strength           |
|--------------------------------------------------------------------------------|---------------------------------|--------------------------------|
| Singlet excited-state energy ( $E_{S1}$ )                                      | 0.98                            | Very Strong<br>$ r  > 0.9$     |
| Occupied–Unoccupied contribution to $S_1$                                      | –0.95                           |                                |
| HOMO–LUMO gap                                                                  | 0.94                            |                                |
| Oscillator strength of the first lowest electronic transition ( $f_{S1}$ )     | 0.91                            |                                |
| Oscillator strength of the second lowest electronic transition ( $f_{S2}$ )    | –0.91                           |                                |
| HOMO–LUMO contribution to $S_2$                                                | –0.91                           |                                |
| Ionization Potential (IP)                                                      | 0.91                            | Strong<br>$0.89 >  r  > 0.7$   |
| Triplet excited-state energy ( $E_{T1}$ )                                      | 0.87                            |                                |
| Integrated absorption spectrum                                                 | –0.87                           |                                |
| Occupied–Unoccupied overlap ( $\eta_{OU}$ )                                    | 0.84                            |                                |
| Triplet exciton binding energy ( $E_{b,T1}$ )                                  | 0.83                            |                                |
| HOMO–LUMO contribution to $S_1$                                                | 0.78                            |                                |
| Singlet exciton binding energy ( $E_{b,S1}$ )                                  | –0.77                           |                                |
| Quadrupole moment ( $Q_\pi$ )                                                  | –0.75                           |                                |
| Rotation energy barrier                                                        | –0.72                           |                                |
| Intramolecular reorganization energy for electron transfer ( $\lambda_{int}$ ) | –0.64                           | Moderate<br>$0.69 >  r  > 0.4$ |
| Internal charge transfer (ICT)                                                 | –0.63                           |                                |
| Dipole moment                                                                  | –0.21                           | Weak<br>$0.39 >  r  > 0.2$     |
| Electron Affinity (EA)                                                         | 0.19                            |                                |

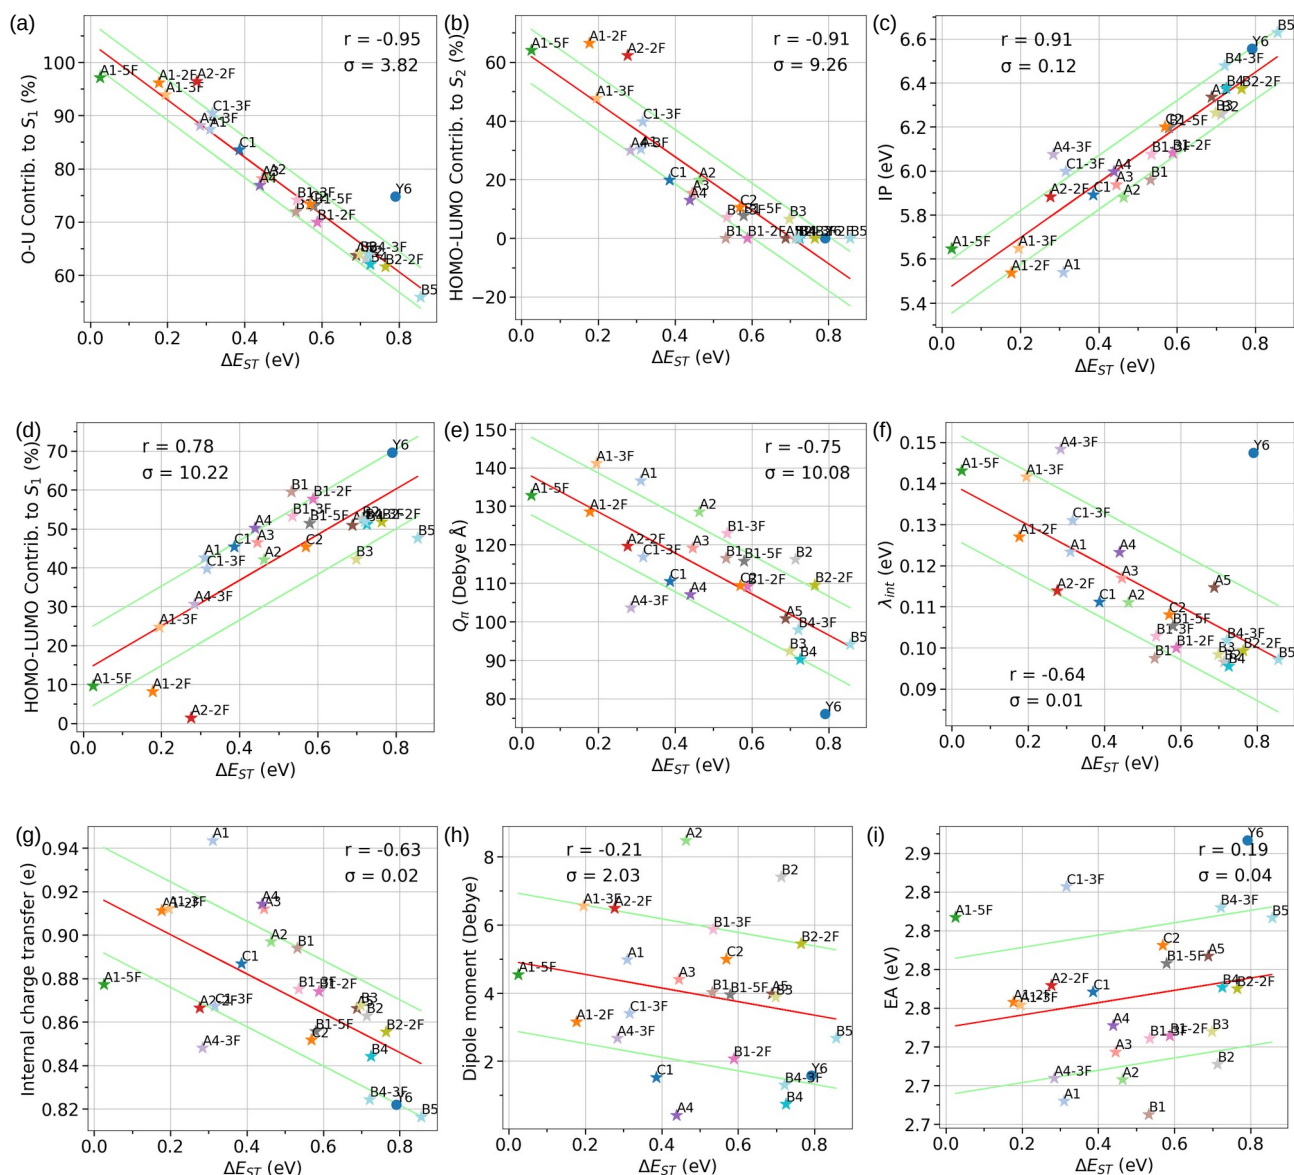

**Figure S6:** Correlation between  $\Delta E_{ST}$  and some molecular properties. (a) Contribution of the Occupied and Unoccupied NTOs to the  $S_1$  transition. (c) Ionization potential. (d) Contribution of the HOMO and LUMO to the  $S_1$  transition. (e) Quadrupole component along the  $\pi$ - $\pi$  stacking direction. (f) Intramolecular reorganization energy. (g) Internal Charge Transfer. (h) Dipole moment. (i) Electron affinity. The linear regression line is in red, where  $r$  is the Pearson's correlation coefficient. The green lines are  $\pm$  one standard deviation ( $\sigma$ ) around the linear regression.

### S3. References

- [1] R. Pollice, P. Friederich, C. Lavigne, G. dos Passos Gomes, A. Aspuru-Guzik, Organic molecules with inverted gaps between first excited singlet and triplet states and appreciable fluorescence rates, *Matter* 4 (5) (2021) 1654–1682.
- [2] P. de Silva, Inverted singlet–triplet gaps and their relevance to thermally activated delayed fluorescence, *The Journal of Physical Chemistry Letters* 10 (18) (2019) 5674–5679.
- [3] L. Tučková, M. Straka, R. R. Valiev, D. Sundholm, On the origin of the inverted singlet–triplet gap of the 5th generation light-emitting molecules, *Physical Chemistry Chemical Physics* 24 (31) (2022) 18713–18721.
- [4] K. D. Wilson, W. H. Styers, S. A. Wood, R. C. Woods, R. J. McMahon, Z. Liu, Y. Yang, E. Garand, Spectroscopic quantification of the inverted singlet–triplet gap in pentaazaphenylene, *Journal of the American Chemical Society*.
